# Supplementary material
Source: publisher site journal article supplement (http://kjim.org/upload/media/kjim-2022-408-Supplementary-Fig-2.pdf)
Supplement: Supplementary file 1 [file kjim-2022-408-Supplementary-Fig-2.pdf]

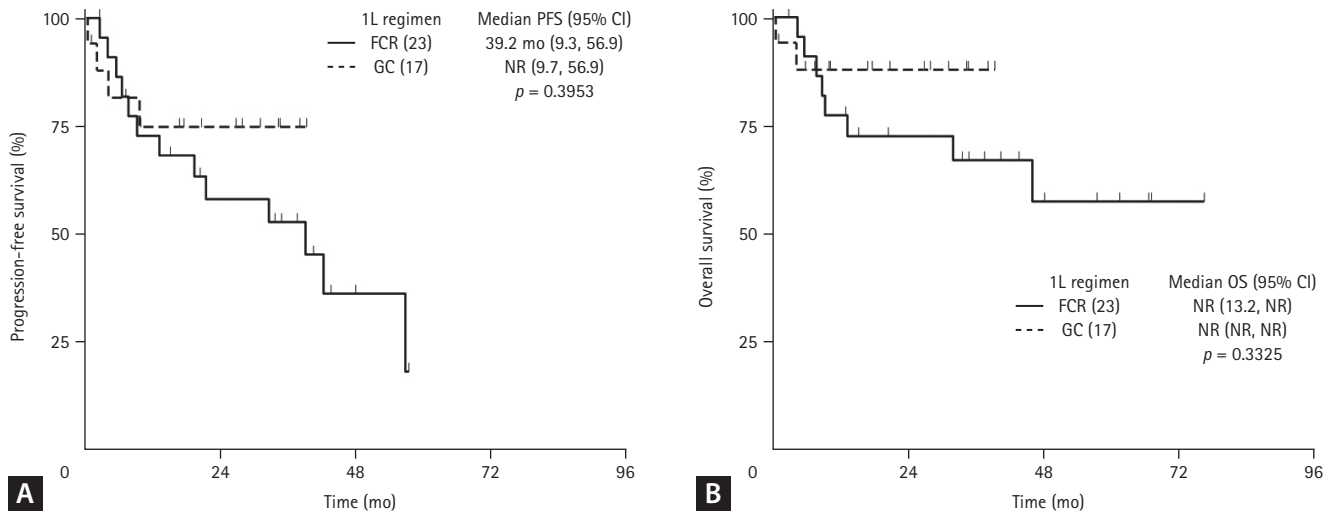

**Supplementary Fig. 2.** Survival outcomes in patients aged > 65 years by first-line (1L) regimen (FCR [fludarabine, cyclophosphamide, and rituximab] vs. GC [obinutuzumab and chlorambucil]). (A) Progression-free survival (PFS), and (B) overall survival (OS). CI, confidence interval; NR, not reached.
